# Supplementary material for: Type 1 innate lymphoid cell–immature neutrophil axis suppresses acute tissue inflammation
Source: Research Square preprint supplement (doi:10.21203/rs.3.rs-4286183/v1), 2024-07-02
Supplement: Supplementary file 1 [file acd67190da1aae332945a591.docx]

**Supplementary information**

**Supplementary Video 1-4.** 3D structural rendering image of immature neutrophils (imNeu) sorted from the BM in WT (Supplementary Video 1, 2) or *Ahnak–/–* (Supplementary Video 3, 4) mice after stimulation with vehicle (Supplementary Video 1, 3) or 100 ng/ml IFN-γ (Supplementary Video 2, 4).

**Supplementary Notes**

**Acknowledgments**

This work was supported by Grant-in-Aid for Scientific Research (A) 21H04836 (AS) and Grant-in-Aid for Early-Career Scientists 23K14498 (KM) from Japan Society for the Promotion of Science, the research grant in the KANAE Foundation for the Promotion of Medical Science (K.M.) and the research scholarship, provided by the Uehara Memorial Foundation (K.M.).
